1        **Multiomic Mendelian randomization-based insights**  
2        **into the role of neutrophil extracellular trap-related**  
3        **genes in sepsis**

4  
5        Yanbo Liu<sup>1,¶,\*</sup>, Yuhui Li<sup>2,¶</sup>, Jinmin Chen<sup>1</sup>, Yongxia Cai<sup>1</sup>, Lukai Lv<sup>3</sup>

6        <sup>1</sup>Department of Emergency, Sir Run Run Shaw Hospital, Zhejiang University School of  
7        Medicine, Hangzhou, Zhejiang Province, China.

8        <sup>2</sup>Department of Ultrasonography Lab, Women's Hospital, Zhejiang University School of  
9        Medicine, Hangzhou, Zhejiang Province, China.

10       <sup>3</sup>Department of Emergency, Wuyi County People's Hospital, Jinhua, Zhejiang Province,  
11       China.

12

13       **¶Equal contribution**

14       **\*Corresponding author:**

15       Yanbo Liu

16       Email: 1282686740@qq.com

17

18       **Short title:** MR analysis of NET-related genes in sepsis

19

20

21

## 22 **Abstract**

23 Sepsis is a life-threatening organ dysfunction caused by a dysregulated host response to  
24 infection. Neutrophil extracellular traps (NETs) have been implicated in the pathogenesis of  
25 sepsis, yet the precise role of NET-related genes (NRGs) remains unclear. This study  
26 employed a multiomic Mendelian randomization (MR) approach, leveraging genetic variants  
27 as instrumental variables to investigate the relationships between NRGs and sepsis risk. We  
28 systematically identified 69 NRGs based on literature and database reviews. Utilizing the IEU  
29 OpenGWAS Project database, we extracted genetic data for sepsis cases and controls.  
30 Expression quantitative trait loci, methylation quantitative trait loci (mQTLs), and protein  
31 quantitative trait loci (pQTLs) associated with NRGs were obtained from the eQTLGen  
32 Consortium, mQTL meta-analysis, and deCODE Genetics datasets, respectively. We  
33 employed the inverse variance-weighted method, supplemented by MR-Egger regression,  
34 weighted median, and Bayesian colocalization analysis, and identified four genes (*CXCR1*,  
35 *CXCR2*, *ENTPD4*, and *MAPK3*) significantly associated with sepsis risk. Three CpG sites  
36 associated with these genes were identified through mQTL-based MR analysis. Additionally,  
37 ten proteins showed significant associations with sepsis risk in pQTL-based MR analysis.  
38 Summary-data-based MR and colocalization analyses confirmed the causal relationship  
39 between *CXCR2* and sepsis, which remained unaffected by pleiotropy. The DNA methylation  
40 level at cg06547715, located in the *CXCR2* enhancer region, was inversely correlated with  
41 *CXCR2* expression and sepsis risk. These findings suggest that NRGs, particularly *CXCR2*,  
42 play a crucial role in sepsis susceptibility and that the DNA methylation status of *CXCR2* may  
43 modulate gene expression, influencing sepsis risk. This study provides novel insights into the

44 molecular epidemiology of sepsis and highlights the potential of NRGs as therapeutic targets.

45 Targeting *CXCR2* and its regulatory mechanisms may offer a new avenue for sepsis

46 management. These findings contribute to the theoretical understanding of sepsis

47 pathogenesis and pave the way for future research into precision medicine for sepsis.

48

49 **Keywords:** Sepsis, Neutrophil Extracellular Traps, Mendelian Randomization, Multiomics,

50 *CXCR2*, DNA Methylation

## 51 **Introduction**

52 Sepsis, an abnormal response to infection, is a leading cause of death among critically ill  
53 patients worldwide[1, 2]. Marked by systemic inflammation, it can quickly lead to organ  
54 failure and death in the absence of prompt treatment[3, 4]. The pathophysiology of sepsis is  
55 complex, involving an intricate interplay among the host immune system, coagulation  
56 cascade, and endothelium[5, 6]. Despite advances in critical care and antibiotic therapy,  
57 sepsis management continues to pose a significant challenge, highlighting the need for  
58 attaining a deeper understanding of the mechanisms underlying this condition and for the  
59 development of novel therapeutic strategies[7-9].

60 Recent studies have highlighted the role of neutrophil extracellular traps (NETs) in the  
61 pathogenesis of sepsis, particularly in the context of COVID-19 infections, wherein NETs  
62 have been implicated in the hyperinflammatory response and microthrombi formation[10,  
63 11]. Neutrophils, the most abundant leukocytes in the human body, play a pivotal role in the  
64 innate immune response against infections[12, 13]. Among their various defense mechanisms,  
65 the formation of NETs has emerged as a critical process in pathogen clearance[14]. NETs are  
66 web-like structures composed of DNA, histones, and antimicrobial proteins, which are  
67 released by neutrophils through a process termed NETosis[15, 16]. While NETs are effective  
68 in trapping and neutralizing a broad spectrum of microbes, excessive NET formation has been  
69 implicated in the pathogenesis of various inflammatory and thrombotic conditions, including  
70 sepsis[17, 18]. The recognition of NETs in the context of sepsis has led to a paradigm shift in  
71 understanding the role of neutrophils in disease pathogenesis. NETs have been shown to  
72 contribute to the formation of microthrombi, exacerbating tissue injury and organ dysfunction

73 during sepsis[19, 20]. Furthermore, NETs can serve as a source of proinflammatory  
74 mediators, potentially driving the systemic inflammation observed in sepsis[21, 22].

75 The involvement of NETs in sepsis is increasingly being recognized, but the mechanisms  
76 governing their formation and their impact on disease severity remain poorly understood[23].  
77 Given the potential impact of NETs on sepsis outcomes, elucidating the genetic and  
78 molecular factors that regulate NETosis is an urgent need. Identifying key regulators of NET  
79 formation may reveal novel therapeutic targets for mitigating the detrimental effects of  
80 excessive NET production in sepsis. In this study, we employed two-sample Mendelian  
81 randomization (MR), a powerful epidemiological tool that leverages genetic variants as  
82 instrumental variables (IVs)[24]. Through the analysis of large-scale genome-wide  
83 association studies (GWASs) and quantitative trait loci (QTL), we investigated the causal  
84 relationship between NETosis-related genes (NRGs) and sepsis risk.

85

## 86 **Materials and methods**

### 87 **Data acquisition**

#### 88 **Identification of NRGs**

89 We systematically identified and curated a comprehensive list of 69 NRGs based on a  
90 thorough review of the existing literature and databases[14, 25], focusing on the role of NETs  
91 in immunity and various diseases. The selection criteria for these genes included their  
92 involvement in the formation, regulation, and biological impact of NETs, encompassing  
93 ligands and receptors that stimulate NETs, downstream signaling pathways, and molecules  
94 known to be components of the NET framework (**S1 Table**).

## 95 **Data sources of methylation, expression, and protein QTLs**

96 We accessed publicly available genomic data relevant to sepsis using the "IEU  
97 OpenGWAS Project" database. This database, known for its extensive collection of GWAS  
98 data, provided a robust platform for our investigation. Specifically, we extracted data from the  
99 hospital episode statistics, which included two sepsis datasets—a primary dataset  
100 (ieu-b-4980) consisting of 11,643 sepsis cases and 474,841 control participants, and a  
101 validation dataset (ieu-b-5088) comprising 11,568 sepsis cases and 451,301 control subjects  
102 (**S2 Table**). Both datasets included individuals of European ancestry, ensuring genetic  
103 homogeneity was maintained for the MR analyses. To screen for expression quantitative trait  
104 locus (eQTL) IVs of the NRGs, genetic variants robustly associated with gene expression  
105 within a 1000 kb range on either side of the coding sequence (cis) were extracted from the  
106 eQTL summary statistics obtained from the eQTLGen Consortium  
107 (<https://www.eqtlgen.org/cis-eqtls.html>). The eQTLGen Consortium includes information on  
108 10,317 single nucleotide polymorphisms (SNPs) associated with traits from 31,684  
109 individuals. Using the methylation quantitative trait locus (mQTL) data from a meta-analysis  
110 of summary statistics from two cohorts (n = 1980) available at  
111 ([https://yanglab.westlake.edu.cn/data/SMR/LBC\\_BSGS\\_meta\\_lite.tar.gz](https://yanglab.westlake.edu.cn/data/SMR/LBC_BSGS_meta_lite.tar.gz)), cis-mQTL IVs  
112 robustly associated with NRG methylation were extracted. From the deCODE Genetics  
113 dataset of 4907 proteins (<https://www.decode.com/summarydata/>), cis-protein quantitative  
114 trait locus (pQTL) IVs associated with the expression of proteins related to NRGs were  
115 selected; all SNPs included in the initial analysis met the criterion of  $P < 5 \times 10^{-8}$ .

## 116 **MR analysis**

## 117 **Assumptions and approach**

118 We used two-sample MR to examine the causal relationships between the QTLs of 69  
119 NRGs and sepsis development. The two-sample MR technique utilizes genetic variants as IVs  
120 to estimate the causal effects of modifiable risk factors by leveraging the random assortment  
121 of alleles at conception. The application of MR in this study was based on three key  
122 assumptions—(1) IVs are strongly associated with the exposure of interest; (2) IVs are  
123 independent of confounders that could influence the outcome; (3) IVs affect the outcome  
124 solely through exposure. Deviations from these assumptions, particularly through pleiotropy,  
125 where IVs affect the outcome through multiple biological pathways, can bias MR estimates.

## 126 **IV selection**

127 The selection of IVs for each NRG was based on established criteria. eQTLs, mQTLs,  
128 and pQTLs associated with NRGs were considered as potential IVs. The criteria for IV  
129 selection included the following: (1) a genome-wide significant association between the SNP  
130 and the gene ( $P < 5 \times 10^{-8}$ ); (2) minimal linkage disequilibrium among SNPs ( $r^2 < 0.1$ ) with a  
131 threshold distance of 10,000 kb to ensure independence; (3) exclusion of SNPs with  
132 palindromic sequences to harmonize exposure and outcome datasets, followed by  
133 MR-PRESSO testing to exclude outlier SNPs; (4) an F-statistic  $\geq 10$  [F-statistic =  
134  $(\text{beta}/\text{se})^2$ ][26] to ensure sufficient statistical power for the IVs in the analysis.

## 135 **Two-sample MR analysis and assessment of heterogeneity and pleiotropy**

136 The primary two-sample MR analysis was conducted using the inverse  
137 variance-weighted (IVW) method. Before IVW analysis, the datasets were assessed for  
138 heterogeneity using Cochran's Q test with a significance threshold of  $P < 0.05$ . A

139 random-effects IVW model was used in the presence of significant heterogeneity, while a  
140 fixed-effects IVW model was applied when no heterogeneity was detected. Complementary  
141 MR methods were employed to strengthen the findings, including MR-Egger regression,  
142 weighted median, weighted model, and simple model. The *P*-values were adjusted to control  
143 the false discovery rate (FDR) at  $\alpha = 0.05$  using the Benjamini-Hochberg method. The  
144 estimated causal effects were quantified using the odds ratio (OR) and the 95% confidence  
145 interval (CI). The MR-Egger regression intercept test was used to assess potential pleiotropy,  
146 with a non-significant  $P > 0.05$  indicating the absence of horizontal pleiotropy. Cochran's Q  
147 statistic from both the MR-Egger and IVW methods was used to detect heterogeneity among  
148 various causal effects, with a Cochran's Q test  $P < 0.05$  indicating heterogeneity[26, 27]. We  
149 also employed the Steiger filtering method to verify the directional associations among  
150 eQTLs, mQTLs, and sepsis.

## 151 **Summary-data-based MR (SMR)**

### 152 **SMR analysis and heterogeneity in the dependent instrument (HEIDI) testing**

153 SMR was employed to ascertain the causal inferences of NRG methylation, expression,  
154 and protein abundance with the risk of sepsis, based on the top associated cis-QTLs. SMR can  
155 reach a much higher statistical power than conventional MR analysis when exposure and  
156 outcome are available from two independent samples with large sample sizes. The top  
157 associated cis-QTLs were selected by considering a window centered around the  
158 corresponding gene ( $\pm 1000$  kb) and passing a *P*-value threshold of  $5.0 \times 10^{-8}$ . The SNPs with  
159 allele frequency differences larger than the specified threshold (set as 0.2 in the present study)  
160 between any pairwise datasets, including the linkage disequilibrium reference sample, the



161 QTL summary data, and the outcome summary data, were excluded. The HEIDI test was  
162 applied to distinguish pleiotropy from linkage, where P-HEIDI values  $<0.01$  were considered  
163 to be likely due to pleiotropy and thus discarded from the analysis. SMR and HEIDI tests  
164 were implemented using the SMR software (version 1.3.1).

### 165 **Colocalization analysis**

166 To confirm the results, we used the coloc R package (version 5.2.3, available at  
167 <https://chr1swallace.github.io/coloc/>)[28] for Bayesian collocation analysis to estimate the  
168 posterior probabilities of shared variants. The collocation analysis relies on four  
169 hypotheses—(1) Phenotype 1 (GWAS) and Phenotype 2 (e.g., eQTL) show no significant  
170 SNP associations in a specific genomic region (H0); (2) Phenotype 1 (GWAS) or Phenotype 2  
171 (e.g., eQTL) shows a significant association with SNPs in a specific genomic region (H1/H2);  
172 (3) Phenotype 1 (GWAS) and Phenotype 2 (e.g., eQTL) are significantly associated with  
173 SNPs in a specific genomic region, but driven by different causal variants (H3); (4)  
174 Phenotype 1 (GWAS) and Phenotype 2 (e.g., eQTL) are significantly associated with SNPs in  
175 a specific genomic region and driven by the same causal variant (H4). We extracted all SNPs  
176 within 100 kb upstream and downstream of the lead SNP in the GWAS for collocation  
177 analysis and calculated the posterior probability H4 (PPH4). In academic contexts, a PPH4  
178 value exceeding 0.75 is conventionally employed as the threshold to indicate evidence of  
179 collocation between GWAS and QTL associations.

### 180 **Ethical Considerations**

181 The data sources utilized in this study, including the IEU OpenGWAS Project, eQTLgen,  
182 the mQTL summary data of McRae et al., and the deCODE Genetics dataset, are all publicly

183 accessible and do not contain any personal identifiers or sensitive personal information that  
184 would require consent. The study followed the Declaration of Helsinki principles and human  
185 subject research guidelines.

## 186 **Results**

### 187 **Analytical process overview**

188 In this study, two-sample MR analysis of IVs was performed separately for sepsis at the  
189 levels of gene expression, methylation, and protein abundance to identify candidate genes  
190 associated with sepsis. These genes were validated using SMR analysis, and significant  
191 eQTLs and mQTLs were advanced to an integrated analysis followed by validation in an  
192 independent cohort. This rigorous process culminated in the identification of *CXCR2* as a  
193 notably associated gene (**Fig 1**).

194

### 195 **Fig 1. Overview of the study design.**

196

### 197 **eQTL-based MR analysis**

198 By intersecting our NRGs with key cis-eQTLs from the eQTLGen consortium, we  
199 identified 62 genes that met our criteria. Applying the established criteria for selecting IVs,  
200 we identified 438 cis-eQTLs associated with these 62 NRGs as the final IVs within our  
201 exposure data. A two-sample MR analysis of patients with sepsis was performed. Using the  
202 IVW method as our primary analytical approach, we identified four genes significantly  
203 associated with sepsis risk (FDR<0.05) (**S3 Table, Fig 2**). These genes include *CXCR1* (OR:  
204 1.11, 95% CI: 1.04–1.17; FDR =  $2.21 \times 10^{-2}$ ), *CXCR2* (OR: 1.14, 95% CI: 1.07–1.21; FDR =

205  $2.68 \times 10^{-3}$ ), *ENTPD4* (OR: 1.16, 95% CI: 1.09–1.24; FDR =  $2.49 \times 10^{-4}$ ), and *MAPK3* (OR:  
206 0.96, 95% CI: 0.93–0.99; FDR =  $4.59 \times 10^{-2}$ ). The primary analysis demonstrated the absence  
207 of heterogeneity ( $P > 0.05$ , **S4 Table**) and pleiotropy ( $P > 0.05$ , **S5 Table**). Additionally,  
208 Steiger filtering corroborated the directional relationship between outcomes and exposures  
209 (**S6 Table**).

210

211 **Fig 2. Mendelian randomization results for the association between the expression of**  
212 **neutrophil extracellular trap-related genes and sepsis risk.**

213

#### 214 **mQTL-based MR analysis**

215 To further explore the epigenetic mechanisms influencing susceptibility to sepsis, we  
216 analyzed mQTLs associated with NRGs. Following stringent criteria for selecting IVs, we  
217 identified 780 cis-mQTLs across 55 NRGs that qualified as the final IVs within our exposure  
218 dataset. We then performed two-sample MR analysis of patients with sepsis. Using the IVW  
219 method as our primary analytical approach, we identified three CpG sites significantly  
220 associated with the sepsis risk (FDR<0.05) (**S7 Table, Fig 3**). These sites include  
221 cg06547715 (OR: 0.92, 95% CI: 0.88–0.97; FDR =  $2.06 \times 10^{-2}$ ), cg14150666 (OR: 0.95, 95%  
222 CI: 0.93–0.97; FDR =  $3.46 \times 10^{-3}$ ), and cg24126361 (OR: 0.97, 95% CI: 0.95–0.99; FDR =  
223  $2.06 \times 10^{-2}$ ), associated with the genes *CXCR2* and *CXCR1*, respectively. The primary  
224 analysis did not indicate any evidence of heterogeneity ( $P > 0.05$ , **S8 Table**) or pleiotropy  
225 ( $P > 0.05$ , **S9 Table**).

226

227 **Fig 3. Mendelian randomization results for the association between neutrophil**  
228 **extracellular trap-related gene methylation and sepsis risk.**

229

### 230 **pQTL-based MR analysis**

231 By screening cis-pQTL data associated with NRGs, we identified 2304 SNPs across 36  
232 NRGs in the exposure data as the final IVs based on the selection criteria ( $FDR < 0.05$ ). Ten  
233 proteins were independently associated with sepsis risk. *SIGLEC14* (OR: 1.02, 95% CI:  
234 1.01–1.04;  $FDR = 8.05 \times 10^{-3}$ ) and *SIGLEC5* (OR: 1.02, 95% CI: 1.01–1.04;  $FDR = 1.13 \times$   
235  $10^{-2}$ ) were positively associated with sepsis risk. Conversely, *AKT2* (OR: 0.94, 95% CI:  
236 0.90–0.97;  $FDR = 4.41 \times 10^{-3}$ ), *CEACAM3* (OR: 0.75, 95% CI: 0.66–0.85;  $FDR = 7.57 \times$   
237  $10^{-5}$ ), *CTSG* (OR: 0.80, 95% CI: 0.69–0.92;  $FDR = 8.77 \times 10^{-3}$ ), *F3* (OR: 0.70, 95% CI:  
238 0.61–0.82;  $FDR = 7.57 \times 10^{-5}$ ), *FCAR* (OR: 0.72, 95% CI: 0.56–0.91;  $FDR = 2.07 \times 10^{-2}$ ),  
239 *HMGB1* (OR: 0.83, 95% CI: 0.76–0.90;  $FDR = 7.57 \times 10^{-5}$ ), *IL17A* (OR: 0.63, 95% CI:  
240 0.44–0.90;  $FDR = 3.55 \times 10^{-2}$ ), and *ITGB2* (OR: 0.77, 95% CI: 0.69–0.88;  $FDR = 3.19 \times$   
241  $10^{-4}$ ), were inversely associated with sepsis risk (**S10 Table, Fig 4**). In the primary analysis,  
242 no heterogeneity ( $P > 0.05$ , **S11 Table**) or horizontal pleiotropy ( $P > 0.05$ , **S12 Table**) was  
243 observed.

244

245 **Fig 4. Mendelian randomization results for the association between neutrophil**  
246 **extracellular trap-related proteins and sepsis risk.**

247

### 248 **SMR and colocalization analyses**

249 Further SMR analysis was conducted to verify the causal relationships between mQTLs  
250 and sepsis, eQTLs and sepsis, as well as pQTLs and sepsis. The protein data were not  
251 significant after SMR analysis, and the *CXCR2* gene was identified through mQTL and eQTL  
252 SMR analyses. The results indicated that *CXCR2* was consistent with the direction of the  
253 effect observed in the MR analysis and passed the HEIDI ( $P > 0.01$ ) and SMR tests ( $P <$   
254  $0.05$ ), suggesting a causal relationship unconfounded by pleiotropy. The SMR plots and effect  
255 estimates are presented in the **S13 Table** and **Fig 5A, B**. Other genes did not demonstrate  
256 significant associations in these analyses. Upon further exploring the causal relationships  
257 between these genes and sepsis, colocalization analysis revealed the details of SNPs (**Fig 5B**)  
258 and showed that *CXCR2* (OR: 1.16, 95% CI: 1.05–1.29; PPH4 = 1), cg06547715 (OR: 0.92,  
259 95% CI: 0.87–0.97; PPH4 = 0.912), and cg14150666 (OR: 0.96, 95% CI: 0.93–0.99; PPH4 =  
260 1) shared a causal variant with sepsis, which added another evidence to our results (**S14-S16**  
261 **Tables, Fig 5C**).

262

263 **Fig 5. SMR and colocalization analysis results in discovery datasets (ieu-b-4980 cohort).**

264 A. MR association between *CXCR2* expression and sepsis risk. B. MR association between  
265 *CXCR2* methylation and sepsis risk. C. Colocalization evidence of the expression and CpG  
266 site methylation of *CXCR2* and sepsis susceptibility.

267

268 **Integration of GWAS and *CXCR2*-related eQTL/mQTL data from**  
269 **the blood**

270 Subsequently, we hypothesized that gene expression could be the underlying mechanism  
271 explaining the plausible causality in the disease. Moreover, DNA methylation (DNAm) in  
272 promoters or enhancers typically plays a crucial role in the regulation of disease-associated  
273 target genes. In this study, we identified *CXCR2*, which encodes a protein belonging to the G  
274 protein-coupled receptor family. This protein serves as a receptor for interleukin 8, which  
275 binds with high affinity and transmits signals through the G-protein-activated second  
276 messenger system. Additionally, this receptor can bind to chemokine (C-X-C motif) ligand 1  
277 (*CXCL1/MGSA*), which is known to stimulate melanoma growth. This receptor mediates the  
278 migration of neutrophils to sites of inflammation. After three-step SMR analysis, we  
279 discovered that the DNAm probe cg06547715 located in the enhancer region of *CXCR2* plays  
280 a crucial role in gene expression regulation. Methylation levels at this site negatively correlate  
281 with *CXCR2* expression ( $\beta\text{SMR} = -0.658$ ) and sepsis ( $\beta\text{SMR} = -0.082$ ). Conversely, the  
282 expression levels of *CXCR2* are positively correlated with sepsis ( $\beta\text{SMR} = 0.13$ ). This  
283 suggests that reduced DNAm levels within the enhancer region of *CXCR2* may upregulate its  
284 expression, increasing susceptibility to sepsis (**S17 Table**).

## 285 **Replication of results in other cohorts**

286 We performed SMR analysis of *CXCR2* in the ieu-b-5088 cohort to validate our findings.  
287 The results showed the methylation level at the cg06547715 site negatively correlated with  
288 sepsis ( $\beta\text{SMR} = -0.0604334$ ), and *CXCR2* expression levels were positively correlated with  
289 the condition ( $\beta\text{SMR} = 0.114256$ ), aligning with the effects observed in cohort ieu-b-4980  
290 (**S18 Table; Fig 6A, B**). Colocalization analysis depicted the details of SNPs locus (**Fig 5B**)  
291 and showed that *CXCR2* (OR: 1.12, 95% CI: 1.01–1.24; PPH4=1), cg06547715 (OR: 0.94,

292 95% CI: 0.89–0.99; PPH4=0.912), and cg14150666 (OR 0.97, 95% CI 0.94–1.00; PPH4=1)

293 shared a causal variant with sepsis, which added additional evidence to our results (**S19-S21**

294 **Tables; Fig 6C**).

295

296 **Fig 6. SMR and colocalization analysis results in validation datasets (ieu-b-5088 cohort).**

297 A. MR association between *CXCR2* expression and sepsis risk. B. MR association between

298 *CXCR2* methylation and sepsis risk. C. Colocalization evidence of the expression and CpG

299 site methylation of *CXCR2* and susceptibility to sepsis.

300

## 301 **Discussion**

302 This study leveraged the multiomic MR method to explore the relationship of NRGs

303 with sepsis risk. Our findings not only contribute to the existing literature but also provide a

304 foundation for future therapeutic interventions. The identification of *CXCR1*, *CXCR2*,

305 *ENTPD4*, and *MAPK3* as genes significantly associated with sepsis risk is consistent with the

306 growing body of evidence suggesting that chemokine signaling and immune response genes

307 are critical in sepsis pathogenesis. The involvement of *CXCR1* underscores the critical role of

308 neutrophil chemotaxis in sepsis. Our findings are consistent with those of previous studies,

309 suggesting that polymorphisms in these genes modulate the immune response to infection[29,

310 30]. The association between *ENTPD4* and sepsis risk is intriguing, given its role in

311 purinergic signaling, which has been implicated in the regulation of NET formation[31, 32].

312 Similarly, the observed association with *MAPK3*, a key regulator of cellular stress responses,

313 aligns with the hypothesis that NETs are part of a broader inflammatory network during  
314 sepsis[33, 34]. The robust association of *CXCR2*, in particular, resonates with prior research  
315 indicating its role in modulating neutrophil migration and the inflammatory cascade central to  
316 sepsis[35-37]. Our multiomic MR approach, which integrates genetic, epigenetic, and  
317 proteomic data, strengthens the causal inference by mitigating confounding and reverse  
318 causation biases inherent in observational studies. The results of colocalization analysis  
319 provided us with additional evidence supporting the role of the *CXCR2* gene in sepsis. Our  
320 analysis showed that the gene expression of *CXCR2* is significantly associated with the risk of  
321 sepsis development, and the PPH4 value is greater than 0.75, indicating that the association  
322 between GWAS and eQTL may be caused by the same causal variant. This finding further  
323 strengthens the possibility of using *CXCR2* as a potential therapeutic target for sepsis.

324 The inverse correlation between DNAm at cg06547715 and *CXCR2* expression and its  
325 subsequent impact on sepsis risk offer a novel perspective on the epigenetic modulation of  
326 immune response genes[38, 39]. This aligns with the emerging paradigm that epigenetic  
327 modifications, especially DNAm, are dynamic and responsive to environmental stimuli,  
328 potentially serving as a molecular switch in the context of sepsis[40]. The implications of our  
329 findings extend to the realm of therapeutics, where targeting *CXCR2* and its regulatory  
330 mechanisms could represent a new frontier in sepsis management[30]. The potential to  
331 modulate gene expression through epigenetic drugs or gene therapies offers a promising  
332 avenue for mitigating the hyperinflammatory state characteristic of sepsis. Furthermore, the  
333 pQTL analysis revealed a direct link between specific proteins and the risk of sepsis  
334 development. By screening cis-pQTL data associated with NRGs, we identified 10 proteins



335 that are significantly associated with the risk of sepsis. For instance, *SIGLEC14* and *SIGLEC5*  
336 are positively correlated, whereas *AKT2*, *CEACAM3*, *CTSG*, *F3*, *FCAR*, *HMGB1*, *IL17A*, and  
337 *ITGB2* are negatively correlated with the risk of sepsis development. These findings suggest  
338 that these proteins may play a key role in the pathogenesis of sepsis, offering new leads for  
339 the development of targeted therapeutic strategies in the future[41-46]. Our results are in line  
340 with those of previous studies that have implicated NRGs in various inflammatory and  
341 autoimmune conditions, suggesting a common pathway in the dysregulation of immune  
342 responses[47, 48]. The consistency of our findings with those from independent cohorts and  
343 the replication of results across different analytical approaches lend credence to the  
344 robustness of our conclusions. While our multiomic MR approach provides a robust platform  
345 for causal inference, it is not without limitations. The reliance on observational data exposes  
346 our study to potential unmeasured confounding despite the use of MR methods to control for  
347 such biases. Due to the limited number of NRG proteins in the pQTL dataset, the present  
348 study did not fully explore the causal relationship between mitochondrial proteins and the risk  
349 of sepsis development.

350 Future research should aim to replicate our findings in diverse populations and  
351 investigate the functional consequences of the genetic and epigenetic variants identified.  
352 Additionally, experimental studies are warranted to elucidate the mechanistic links among  
353 NRGs, inflammation, and sepsis development, potentially leading to the discovery of new  
354 biomarkers and therapeutic targets.

355 In conclusion, our multiomic MR study provides a deeper understanding of the role of  
356 NRGs in sepsis, with a particular focus on *CXCR2*. Our findings have significant implications

357 for the development of precision medicine strategies for sepsis and highlight the importance  
358 of integrating genetic and epigenetic data in the quest for novel therapeutic targets. The  
359 identification of *CXCR2* as a key gene in sepsis risk offers a promising starting point for  
360 future research and interventional studies aimed at improving the outcomes in patients with  
361 this devastating condition.

362

## 363 **Acknowledgments**

364 We gratefully acknowledge the authors and participants of all GWASs, including the IEU  
365 OpenGWAS Project, eQTLgen, the mQTL summary data of McRae et al., and the deCODE  
366 Genetics dataset, from which we utilized summary statistics data.

## 367 **References**

368

- 369 1. Singer M, Deutschman CS, Seymour CW, Shankar-Hari M, Annane D, Bauer M, et al.  
370 The Third International Consensus Definitions for Sepsis and Septic Shock (Sepsis-3). *Jama*.  
371 2016;315(8):801-10.
- 372 2. Schlapbach LJ, Watson RS, Sorce LR, Argent AC, Menon K, Hall MW, et al.  
373 International Consensus Criteria for Pediatric Sepsis and Septic Shock. *Jama*.  
374 2024;331(8):665-74.
- 375 3. De Backer D, Deutschman CS, Hellman J, Myatra SN, Ostermann M, Prescott HC, et al.  
376 Surviving Sepsis Campaign Research Priorities 2023. *Critical care medicine*.  
377 2024;52(2):268-96.
- 378 4. Cecconi M, Evans L, Levy M, Rhodes A. Sepsis and septic shock. *Lancet (London,*  
379 *England)*. 2018;392(10141):75-87.
- 380 5. Bode C, Weis S, Sauer A, Wendel-Garcia P, David S. Targeting the host response in

- 381 sepsis: current approaches and future evidence. *Critical care* (London, England).  
382 2023;27(1):478.
- 383 6. Zhang H, Wang Y, Qu M, Li W, Wu D, Cata JP, et al. Neutrophil, neutrophil  
384 extracellular traps and endothelial cell dysfunction in sepsis. *Clinical and translational*  
385 *medicine*. 2023;13(1):e1170.
- 386 7. Hamilton FW, Thomas M, Arnold D, Palmer T, Moran E, Mentzer AJ, et al. Therapeutic  
387 potential of IL6R blockade for the treatment of sepsis and sepsis-related death: A Mendelian  
388 randomisation study. *PLoS medicine*. 2023;20(1):e1004174.
- 389 8. Boufenzler A, Carrasco K, Jolly L, Brustolin B, Di-Pillo E, Derive M, et al. Potentiation  
390 of NETs release is novel characteristic of TREM-1 activation and the pharmacological  
391 inhibition of TREM-1 could prevent from the deleterious consequences of NETs release in  
392 sepsis. *Cellular & molecular immunology*. 2021;18(2):452-60.
- 393 9. Ou Q, Tan L, Shao Y, Lei F, Huang W, Yang N, et al. Electrostatic Charge-Mediated  
394 Apoptotic Vesicle Biodistribution Attenuates Sepsis by Switching Neutrophil NETosis to  
395 Apoptosis. *Small* (Weinheim an der Bergstrasse, Germany). 2022;18(20):e2200306.
- 396 10. Tocilizumab in patients admitted to hospital with COVID-19 (RECOVERY): a  
397 randomised, controlled, open-label, platform trial. *Lancet* (London, England).  
398 2021;397(10285):1637-45.
- 399 11. Warner S, Teague HL, Ramos-Benitez MJ, Panicker S, Allen K, Gaihre S, et al. R406  
400 reduces lipopolysaccharide-induced neutrophil activation. *Cellular immunology*.  
401 2024;403-404:104860.
- 402 12. Grüneboom A, Aust O, Cibir Z, Weber F, Hermann DM, Gunzer M. Imaging innate  
403 immunity. *Immunological reviews*. 2022;306(1):293-303.
- 404 13. Ramoni D, Tirandi A, Montecucco F, Liberale L. Sepsis in elderly patients: the role of  
405 neutrophils in pathophysiology and therapy. *Internal and emergency medicine*.  
406 2024;19(4):901-17.
- 407 14. Papayannopoulos V. Neutrophil extracellular traps in immunity and disease. *Nature*  
408 *reviews Immunology*. 2018;18(2):134-47.
- 409 15. Skallberg A, Bunnfors K, Brommesson C, Uvdal K. Neutrophils Activated by  
410 Nanoparticles and Formation of Neutrophil Extracellular Traps: Work Function Mapping and

- 411 Element Specific Imaging. *Analytical chemistry*. 2019;91(21):13514-20.
- 412 16. Kolaczowska E, Jenne CN, Surewaard BG, Thanabalasuriar A, Lee WY, Sanz MJ, et al.  
413 Molecular mechanisms of NET formation and degradation revealed by intravital imaging in  
414 the liver vasculature. *Nature communications*. 2015;6:6673.
- 415 17. Baz AA, Hao H, Lan S, Li Z, Liu S, Chen S, et al. Neutrophil extracellular traps in  
416 bacterial infections and evasion strategies. *Frontiers in immunology*. 2024;15:1357967.
- 417 18. Kiwit A, Lu Y, Lenz M, Knopf J, Mohr C, Ledermann Y, et al. The Dual Role of  
418 Neutrophil Extracellular Traps (NETs) in Sepsis and Ischemia-Reperfusion Injury:  
419 Comparative Analysis across Murine Models. *International journal of molecular sciences*.  
420 2024;25(7).
- 421 19. Zhu S, Yu Y, Qu M, Qiu Z, Zhang H, Miao C, et al. Neutrophil extracellular traps  
422 contribute to immunothrombosis formation via the STING pathway in sepsis-associated lung  
423 injury. *Cell death discovery*. 2023;9(1):315.
- 424 20. Thiam HR, Wong SL, Wagner DD, Waterman CM. Cellular Mechanisms of NETosis.  
425 *Annual review of cell and developmental biology*. 2020;36:191-218.
- 426 21. Kumar S, Payal N, Srivastava VK, Kaushik S, Saxena J, Jyoti A. Neutrophil extracellular  
427 traps and organ dysfunction in sepsis. *Clinica chimica acta; international journal of clinical*  
428 *chemistry*. 2021;523:152-62.
- 429 22. Yao YM, Osuchowski MF, Wang JH, Pan ZK. Editorial: Immune Dysfunction: An  
430 Update of New Immune Cell Subsets and Cytokines in Sepsis. *Frontiers in immunology*.  
431 2021;12:822068.
- 432 23. Mengozzi L, Barison I, Malý M, Lorenzoni G, Fedrigo M, Castellani C, et al. Neutrophil  
433 Extracellular Traps and Thrombolysis Resistance: New Insights for Targeting Therapies.  
434 *Stroke*. 2024;55(4):963-71.
- 435 24. Zuber V, Colijn JM, Klaver C, Burgess S. Selecting likely causal risk factors from  
436 high-throughput experiments using multivariable Mendelian randomization. *Nature*  
437 *communications*. 2020;11(1):29.
- 438 25. Zhang Y, Guo L, Dai Q, Shang B, Xiao T, Di X, et al. A signature for pan-cancer  
439 prognosis based on neutrophil extracellular traps. *Journal for immunotherapy of cancer*.  
440 2022;10(6).

- 441 26. Papadimitriou N, Dimou N, Tsilidis KK, Banbury B, Martin RM, Lewis SJ, et al.  
442 Physical activity and risks of breast and colorectal cancer: a Mendelian randomisation  
443 analysis. *Nature communications*. 2020;11(1):597.
- 444 27. Burgess S, Thompson SG. Interpreting findings from Mendelian randomization using the  
445 MR-Egger method. *European journal of epidemiology*. 2017;32(5):377-89.
- 446 28. Giambartolomei C, Vukcevic D, Schadt EE, Franke L, Hingorani AD, Wallace C, et al.  
447 Bayesian test for colocalisation between pairs of genetic association studies using summary  
448 statistics. *PLoS genetics*. 2014;10(5):e1004383.
- 449 29. Zhao H, Li Y, Sun G, Cheng M, Ding X, Wang K. Single-cell transcriptional gene  
450 signature analysis identifies IL-17 signaling pathway as the key pathway in sepsis.  
451 *Immunobiology*. 2023;228(6):152763.
- 452 30. AlSabani M, Abrams ST, Cheng Z, Morton B, Lane S, Alosaimi S, et al. Reduction of  
453 NETosis by targeting CXCR1/2 reduces thrombosis, lung injury, and mortality in  
454 experimental human and murine sepsis. *British journal of anaesthesia*. 2022;128(2):283-93.
- 455 31. Avital-Shacham M, Sharf R, Kleinberger T. NTPDASE4 gene products cooperate with  
456 the adenovirus E4orf4 protein through PP2A-dependent and -independent mechanisms and  
457 contribute to induction of cell death. *Journal of virology*. 2014;88(11):6318-28.
- 458 32. Shaikh S, Basu S, Bag S, Chatterjee A, Datta S, Banerjee D, et al. Uracil as a biomarker  
459 for spatial pyrimidine metabolism in the development of gingivobuccal oral squamous cell  
460 carcinoma. *Scientific reports*. 2024;14(1):11609.
- 461 33. Li X, Jiang S, Wang B, He S, Guo X, Lin J, et al. Integrated multi-omics analysis and  
462 machine learning developed diagnostic markers and prognostic model based on  
463 Efferocytosis-associated signatures for septic cardiomyopathy. *Clinical immunology*  
464 (Orlando, Fla). 2024;265:110301.
- 465 34. Cao B, Xu Z, Liu C, Hu J, Zhu Z, Li J, et al. Protective effects of notoginsenoside R1 on  
466 acute lung injury in rats with sepsis. *Annals of translational medicine*. 2021;9(12):996.
- 467 35. Wu Y, Wang S, Farooq SM, Castelveter MP, Hou Y, Gao JL, et al. A chemokine  
468 receptor CXCR2 macromolecular complex regulates neutrophil functions in inflammatory  
469 diseases. *The Journal of biological chemistry*. 2012;287(8):5744-55.
- 470 36. Boppana NB, Devarajan A, Gopal K, Barathan M, Bakar SA, Shankar EM, et al.

- 471 Blockade of CXCR2 signalling: a potential therapeutic target for preventing  
472 neutrophil-mediated inflammatory diseases. *Experimental biology and medicine* (Maywood,  
473 NJ). 2014;239(5):509-18.
- 474 37. Kim SD, Lee HY, Shim JW, Kim HJ, Yoo YH, Park JS, et al. Activation of CXCR2 by  
475 extracellular matrix degradation product acetylated Pro-Gly-Pro has therapeutic effects  
476 against sepsis. *American journal of respiratory and critical care medicine*.  
477 2011;184(2):243-51.
- 478 38. Caldwell BA, Wu Y, Wang J, Li L. Altered DNA methylation underlies monocyte  
479 dysregulation and innate exhaustion memory in sepsis. *bioRxiv : the preprint server for*  
480 *biology*. 2023.
- 481 39. Binnie A, Walsh CJ, Hu P, Dwivedi DJ, Fox-Robichaud A, Liaw PC, et al. Epigenetic  
482 Profiling in Severe Sepsis: A Pilot Study of DNA Methylation Profiles in Critical Illness.  
483 *Critical care medicine*. 2020;48(2):142-50.
- 484 40. Martino D, Kresoje N, Amenyogbe N, Ben-Othman R, Cai B, Lo M, et al. DNA  
485 Methylation signatures underpinning blood neutrophil to lymphocyte ratio during first week  
486 of human life. *Nature communications*. 2024;15(1):8167.
- 487 41. Kim HG, Lee C, Yoon JH, Kim JH, Cho JY. BN82002 alleviated tissue damage of septic  
488 mice by reducing inflammatory response through inhibiting AKT2/NF- $\kappa$ B signaling pathway.  
489 *Biomedicine & pharmacotherapy = Biomedecine & pharmacotherapie*. 2022;148:112740.
- 490 42. Liu YC, Yu MM, Chai YF, Shou ST. Sialic Acids in the Immune Response during  
491 Sepsis. *Frontiers in immunology*. 2017;8:1601.
- 492 43. Klaile E, Müller MM, Schäfer MR, Clauder AK, Feer S, Heyl KA, et al. Binding of  
493 *Candida albicans* to Human CEACAM1 and CEACAM6 Modulates the Inflammatory  
494 Response of Intestinal Epithelial Cells. *mBio*. 2017;8(2).
- 495 44. You G, Zhao X, Liu J, Yao K, Yi X, Chen H, et al. Machine learning-based  
496 identification of CYBB and FCAR as potential neutrophil extracellular trap-related treatment  
497 targets in sepsis. *Frontiers in immunology*. 2023;14:1253833.
- 498 45. Deng M, Tang Y, Li W, Wang X, Zhang R, Zhang X, et al. The Endotoxin Delivery  
499 Protein HMGB1 Mediates Caspase-11-Dependent Lethality in Sepsis. *Immunity*.  
500 2018;49(4):740-53.e7.

- 501 46. Nakada TA, Russell JA, Boyd JH, Walley KR. IL17A genetic variation is associated  
502 with altered susceptibility to Gram-positive infection and mortality of severe sepsis. *Critical*  
503 *care* (London, England). 2011;15(5):R254.
- 504 47. Xiang J, Cao J, Wang X, Shao S, Huang J, Zhang L, et al. Neutrophil extracellular traps  
505 and neutrophil extracellular traps-related genes are involved in new-onset atrial fibrillation in  
506 LPS-induced sepsis. *International immunopharmacology*. 2024;138:112550.
- 507 48. Tang J, Lu H, Xie Z, Jia X, Su T, Lin B. Identification of potential biomarkers for sepsis  
508 based on neutrophil extracellular trap-related genes. *Diagnostic microbiology and infectious*  
509 *disease*. 2024;110(1):116380.
- 510

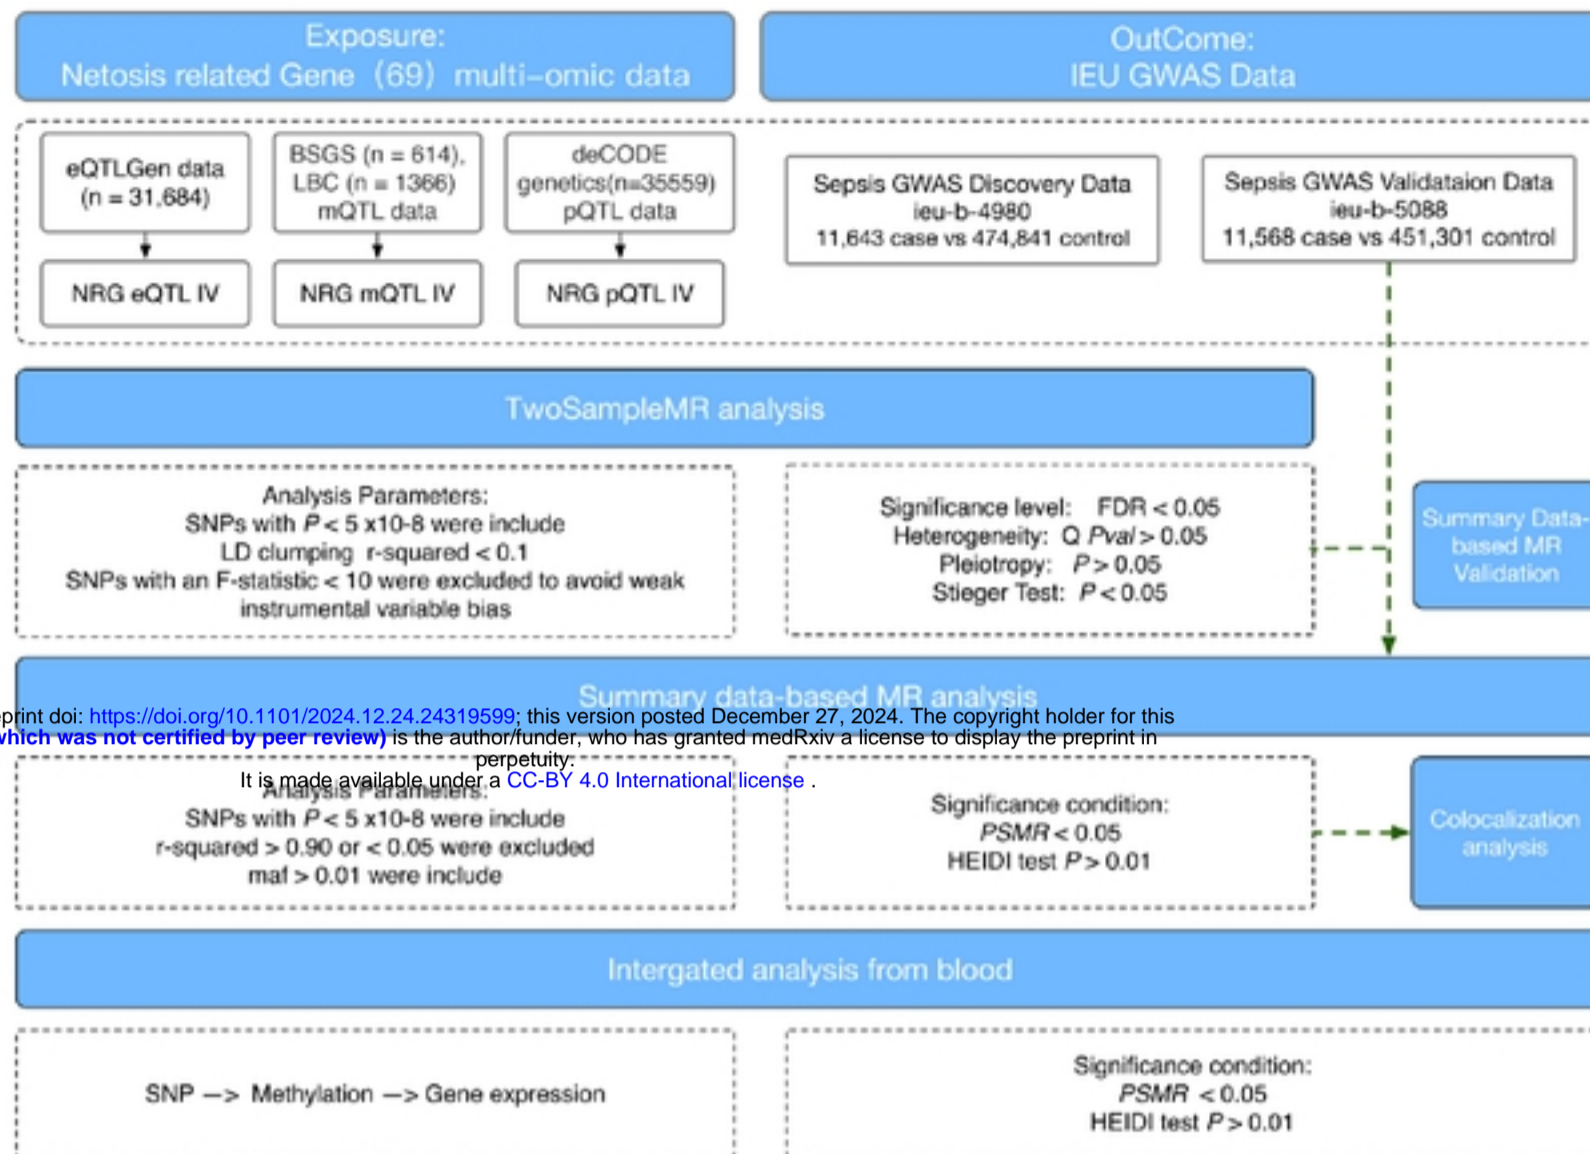

medRxiv preprint doi: <https://doi.org/10.1101/2024.12.24.24319599>; this version posted December 27, 2024. The copyright holder for this preprint (which was not certified by peer review) is the author/funder, who has granted medRxiv a license to display the preprint in perpetuity.

It is made available under a [CC-BY 4.0 International license](https://creativecommons.org/licenses/by/4.0/).

Fig 1



medRxiv preprint doi: <https://doi.org/10.1101/2024.12.24.24319599>; this version posted December 27, 2024. The copyright holder for this preprint (which was not certified by peer review) is the author/funder, who has granted medRxiv a license to display the preprint in perpetuity. It is made available under a [CC-BY 4.0 International license](https://creativecommons.org/licenses/by/4.0/).

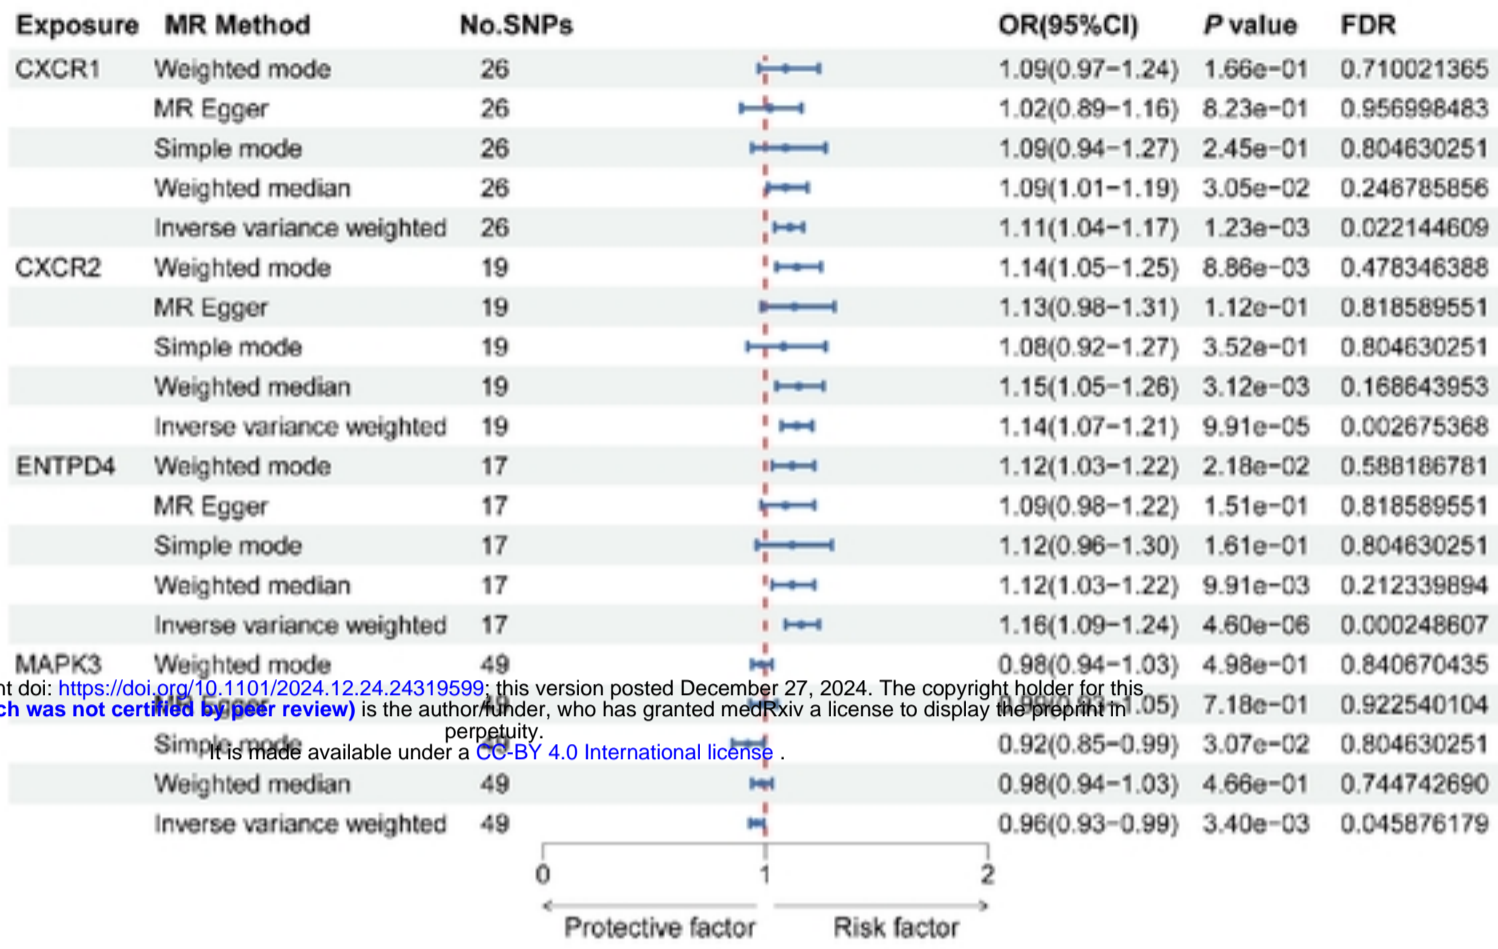

Fig2

| Exposure   | CpG        | MR Method                 | No.SNPs |  | OR(95%CI)       | P value  | FDR      |
|------------|------------|---------------------------|---------|--|-----------------|----------|----------|
| CXCR2      | cg06547715 | Weighted mode             | 3       |  | 0.92(0.87-0.97) | 1.04e-01 | 8.80e-01 |
|            |            | Weighted median           | 3       |  | 0.92(0.88-0.97) | 1.93e-03 | 8.60e-02 |
|            |            | Simple mode               | 3       |  | 0.93(0.86-1.01) | 2.12e-01 | 9.51e-01 |
|            |            | MR Egger                  | 3       |  | 0.93(0.80-1.07) | 4.80e-01 | 9.99e-01 |
|            |            | Inverse variance weighted | 3       |  | 0.92(0.88-0.97) | 6.93e-04 | 2.06e-02 |
| cg14150666 | cg14150666 | Weighted mode             | 9       |  | 0.96(0.93-0.99) | 2.63e-02 | 8.80e-01 |
|            |            | Weighted median           | 9       |  | 0.95(0.93-0.98) | 1.23e-03 | 8.60e-02 |
|            |            | Simple mode               | 9       |  | 0.97(0.92-1.02) | 2.26e-01 | 9.51e-01 |
|            |            | MR Egger                  | 9       |  | 0.97(0.91-1.03) | 3.97e-01 | 9.99e-01 |
|            |            | Inverse variance weighted | 9       |  | 0.95(0.93-0.97) | 3.89e-05 | 3.46e-03 |
| SLC25A37   | cg24126361 | Weighted mode             | 14      |  | 0.99(0.96-1.01) | 2.64e-01 | 8.80e-01 |
|            |            | Weighted median           | 14      |  | 0.97(0.94-0.99) | 5.99e-03 | 1.78e-01 |
|            |            | Simple mode               | 14      |  | 0.95(0.91-0.99) | 2.62e-02 | 9.51e-01 |
|            |            | MR Egger                  | 14      |  | 0.98(0.95-1.02) | 3.44e-01 | 9.99e-01 |
|            |            | Inverse variance weighted | 14      |  | 0.97(0.95-0.99) | 5.89e-04 | 2.06e-02 |

medRxiv preprint doi: <https://doi.org/10.1101/2024.12.24.24319599>; this version posted December 27, 2024. The copyright holder for this preprint (which was not certified by peer review) is the author/funder, who has granted medRxiv a license to display the preprint in perpetuity. It is made available under a [CC-BY 4.0 International license](https://creativecommons.org/licenses/by/4.0/).

Protective factor      Risk factor

medRxiv preprint doi: <https://doi.org/10.1101/2024.12.24.24319599>; this version posted December 27, 2024. The copyright holder for this preprint (which was not certified by peer review) is the author/funder, who has granted medRxiv a license to display the preprint in perpetuity. It is made available under a [CC-BY 4.0 International license](https://creativecommons.org/licenses/by/4.0/).

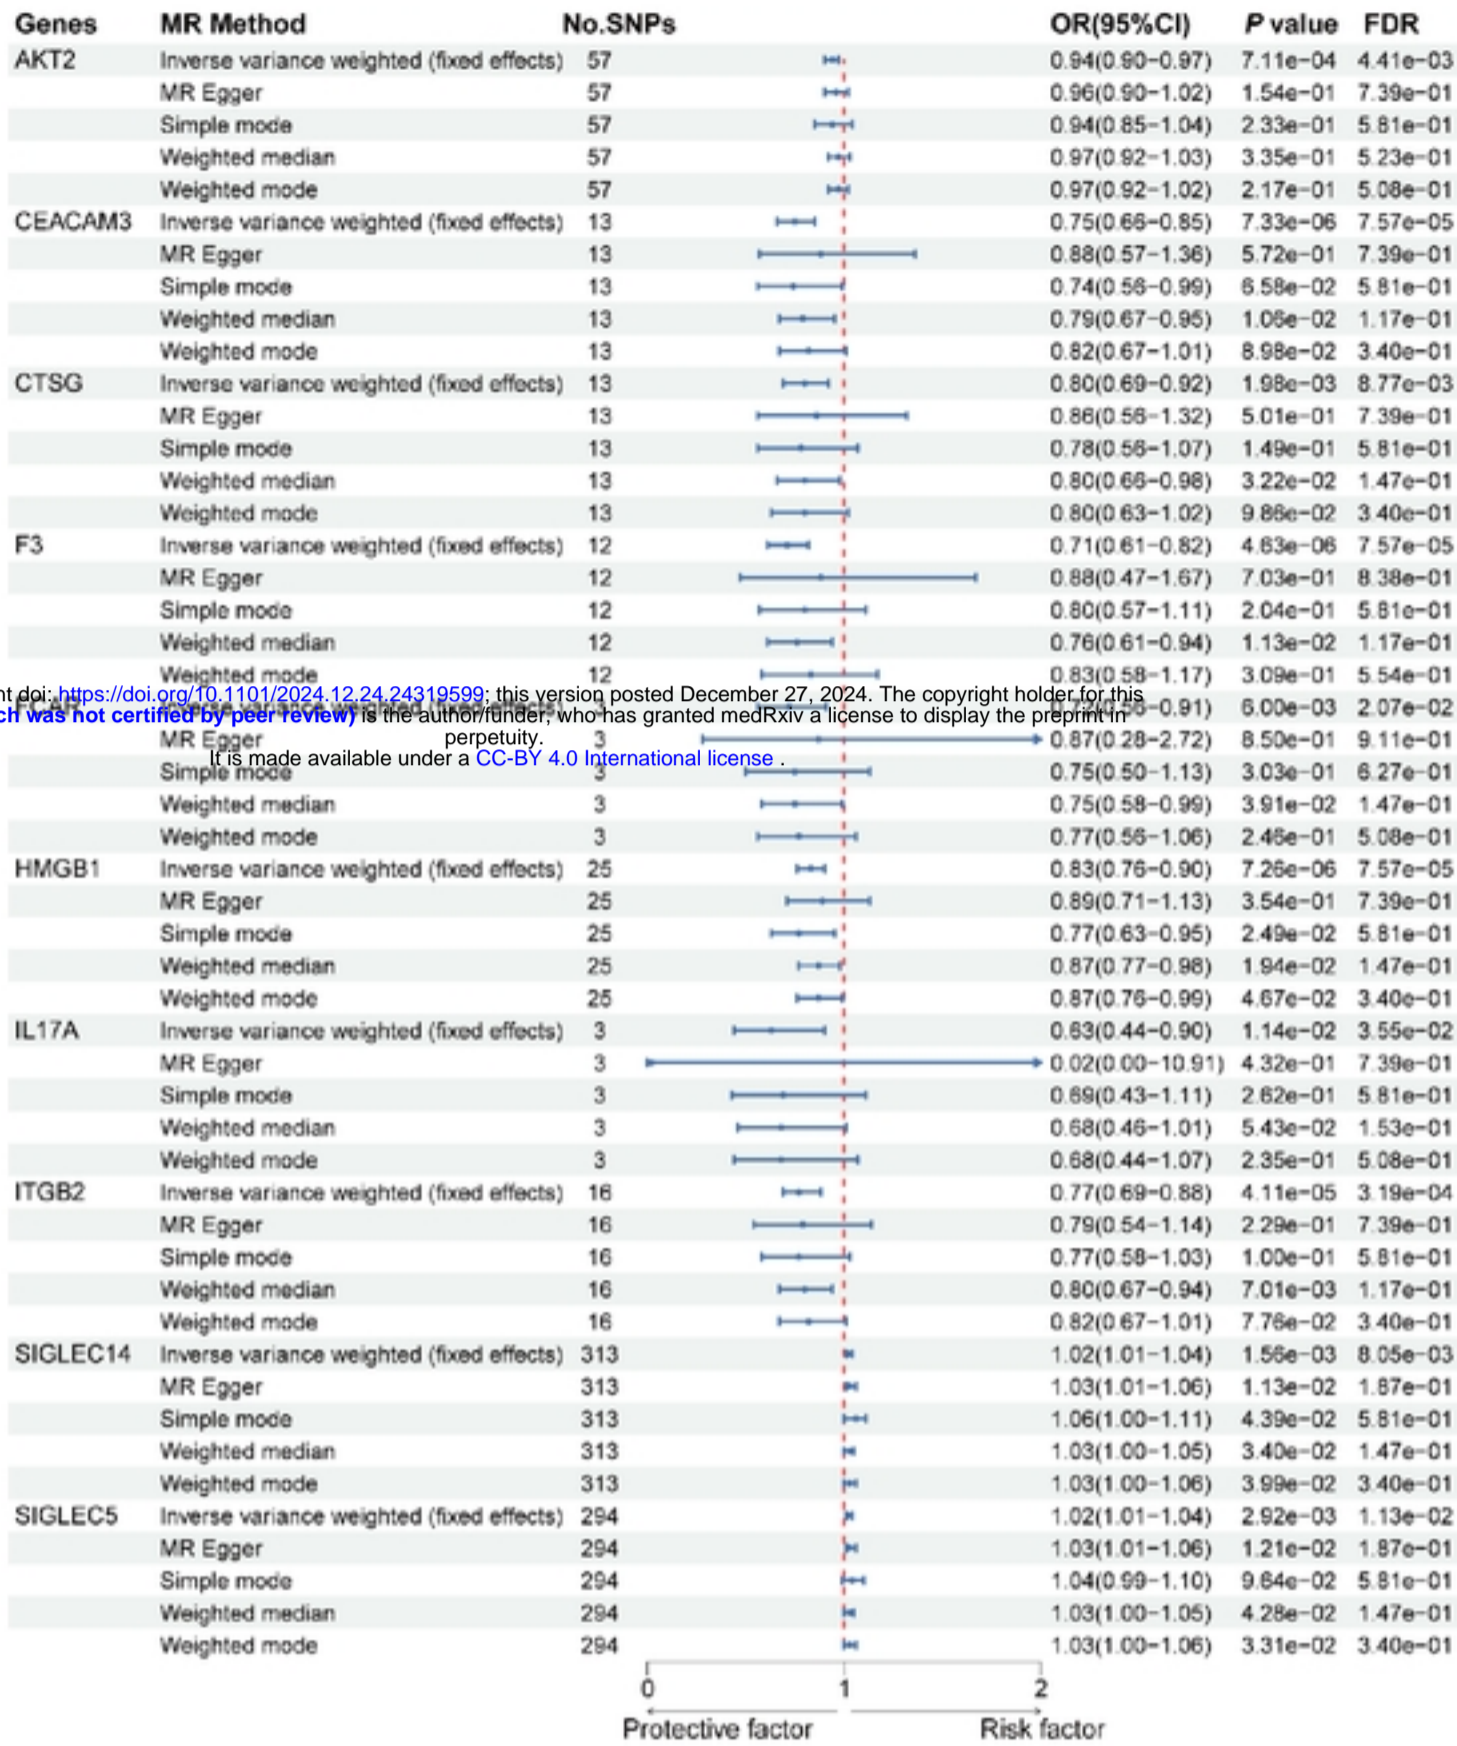

Fig 4

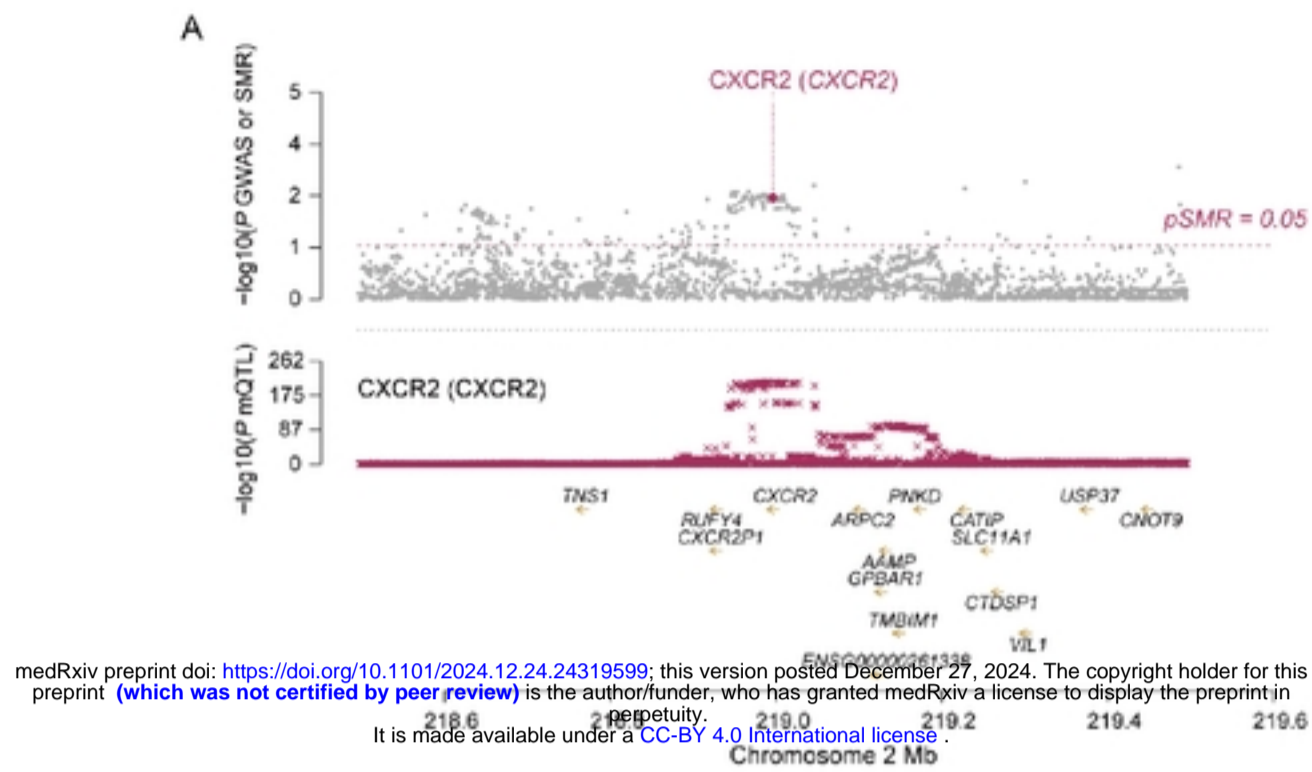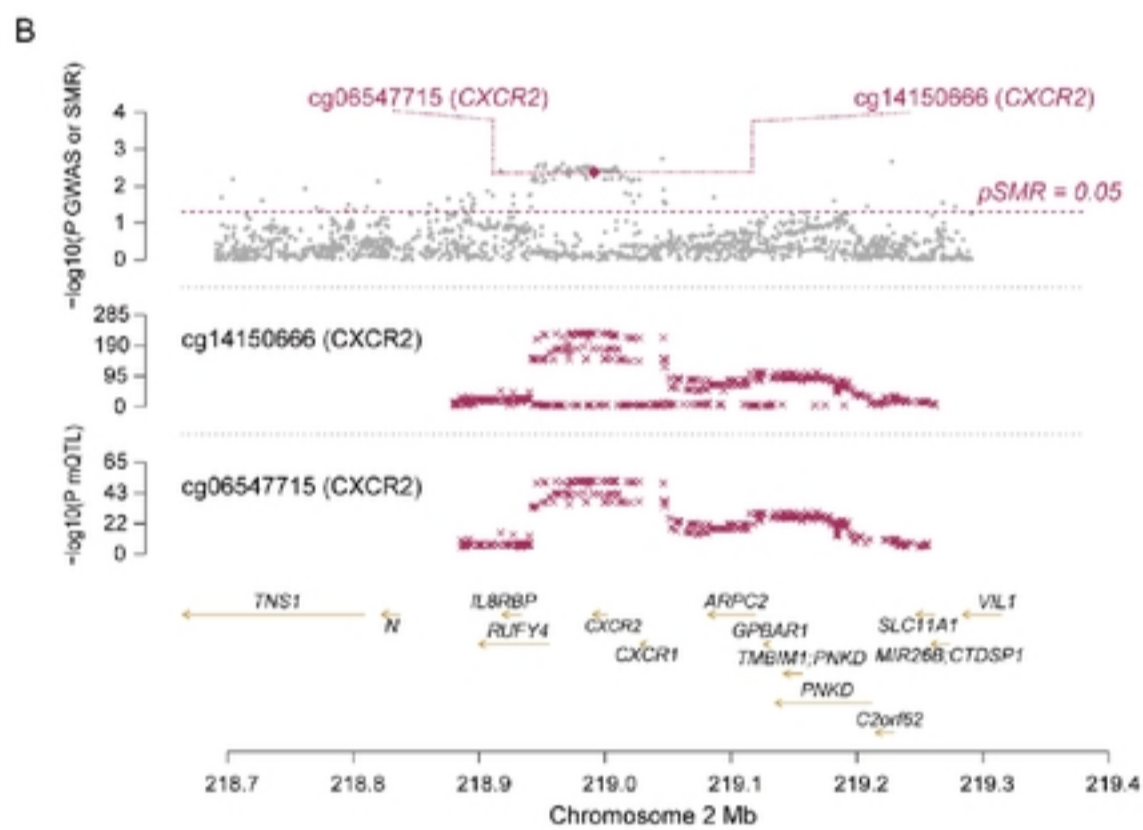

**C**

| Gene  | Probe ID        | OR(95%CI)       | P value  | p_HEIDI  | PPH4  |
|-------|-----------------|-----------------|----------|----------|-------|
| CXCR2 | ENSG00000180871 | 1.16(1.05-1.29) | 3.48e-03 | 8.05e-01 | 1.000 |
| CXCR2 | cg06547715      | 0.92(0.87-0.97) | 4.40e-03 | 7.43e-01 | 0.912 |
| CXCR2 | cg14150666      | 0.96(0.93-0.99) | 4.08e-03 | 7.25e-01 | 1.000 |

0 1 2  
Protective factor Risk factor

Fig 5

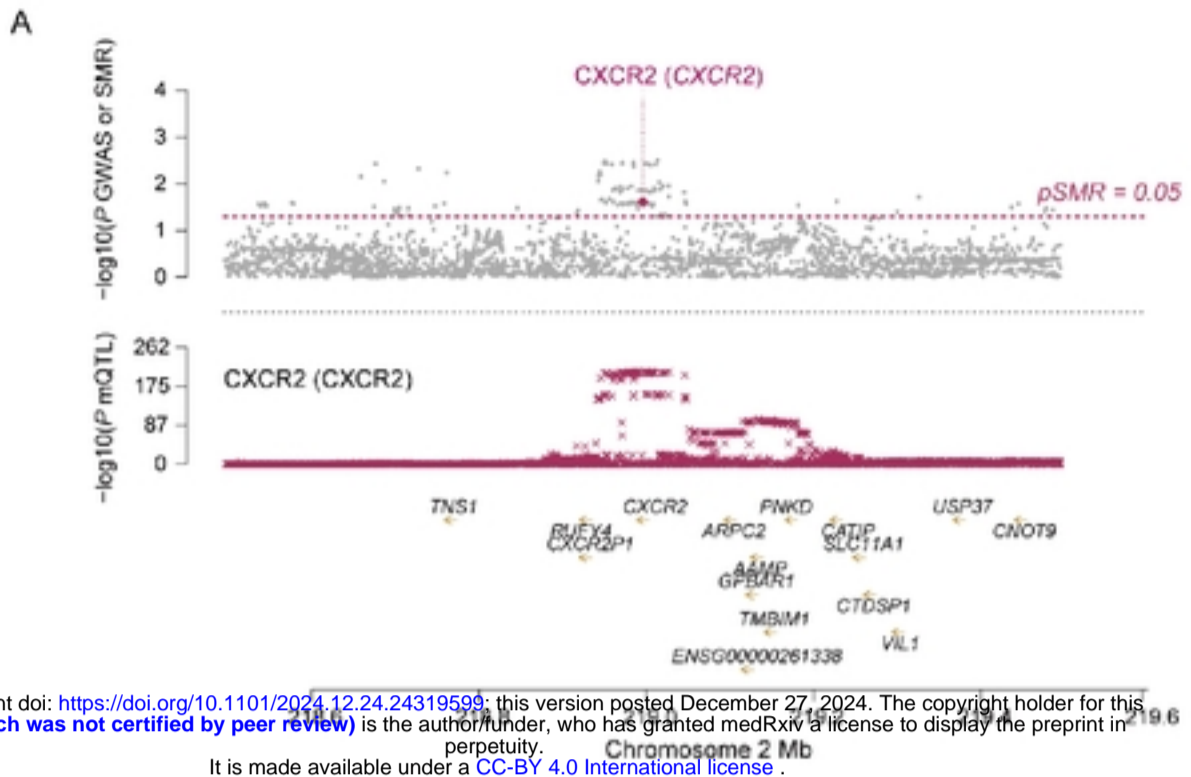

medRxiv preprint doi: <https://doi.org/10.1101/2024.12.24.24319599>; this version posted December 27, 2024. The copyright holder for this preprint (which was not certified by peer review) is the author/funder, who has granted medRxiv a license to display the preprint in perpetuity. It is made available under a [CC-BY 4.0 International license](https://creativecommons.org/licenses/by/4.0/).

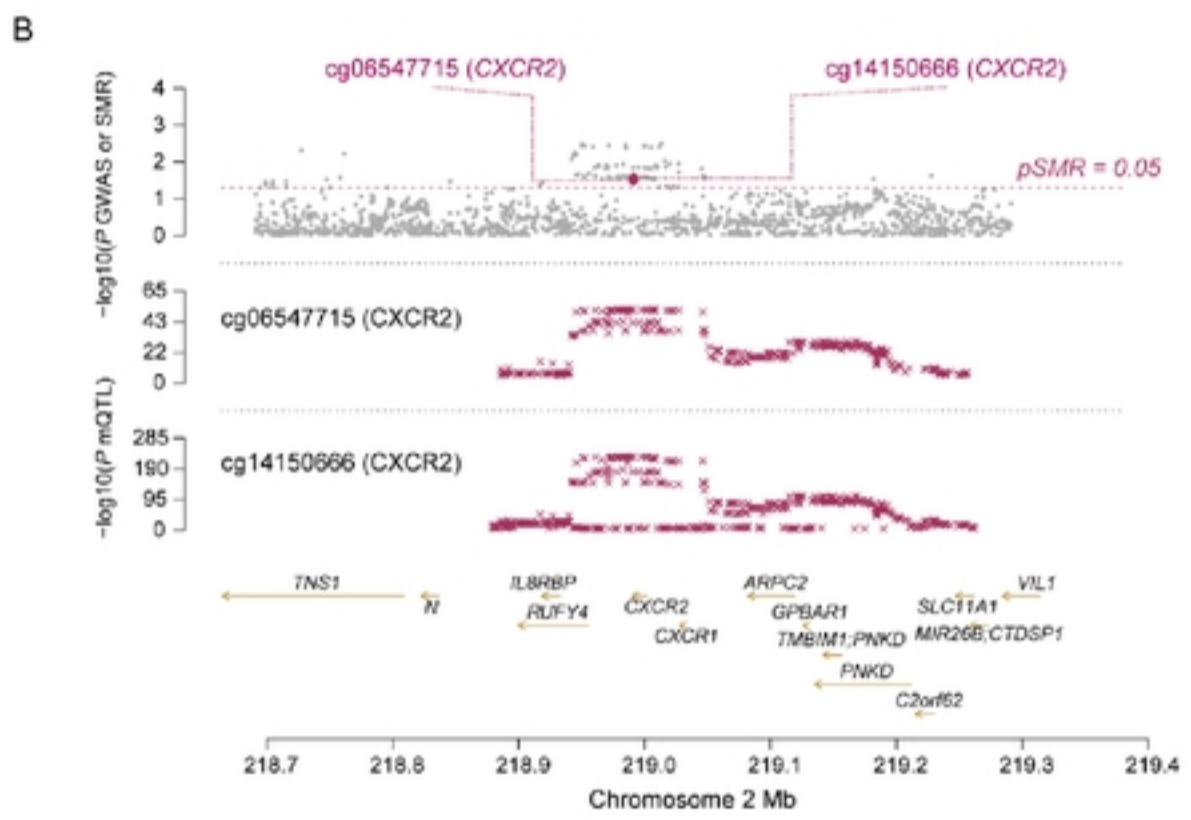

**C**

| Gene  | Probe ID        | OR(95%CI)       | P value  | p_HEIDI  | PPH4  |
|-------|-----------------|-----------------|----------|----------|-------|
| CXCR2 | ENSG00000180871 | 1.12(1.01-1.24) | 2.45e-02 | 8.86e-01 | 1.000 |
| CXCR2 | cg06547715      | 0.94(0.89-0.99) | 3.19e-02 | 9.04e-01 | 0.912 |
| CXCR2 | cg14150666      | 0.97(0.94-1.00) | 2.68e-02 | 8.93e-01 | 1.000 |

0 1 2  
Protective factor Risk factor

Fig 6
